# Supplementary material
Source: Springer Nature journal article supplement (https://www.springermedizin.de/resource/supplementary/12948_2010_78_MOESM1_ESM.pdf/9557182)

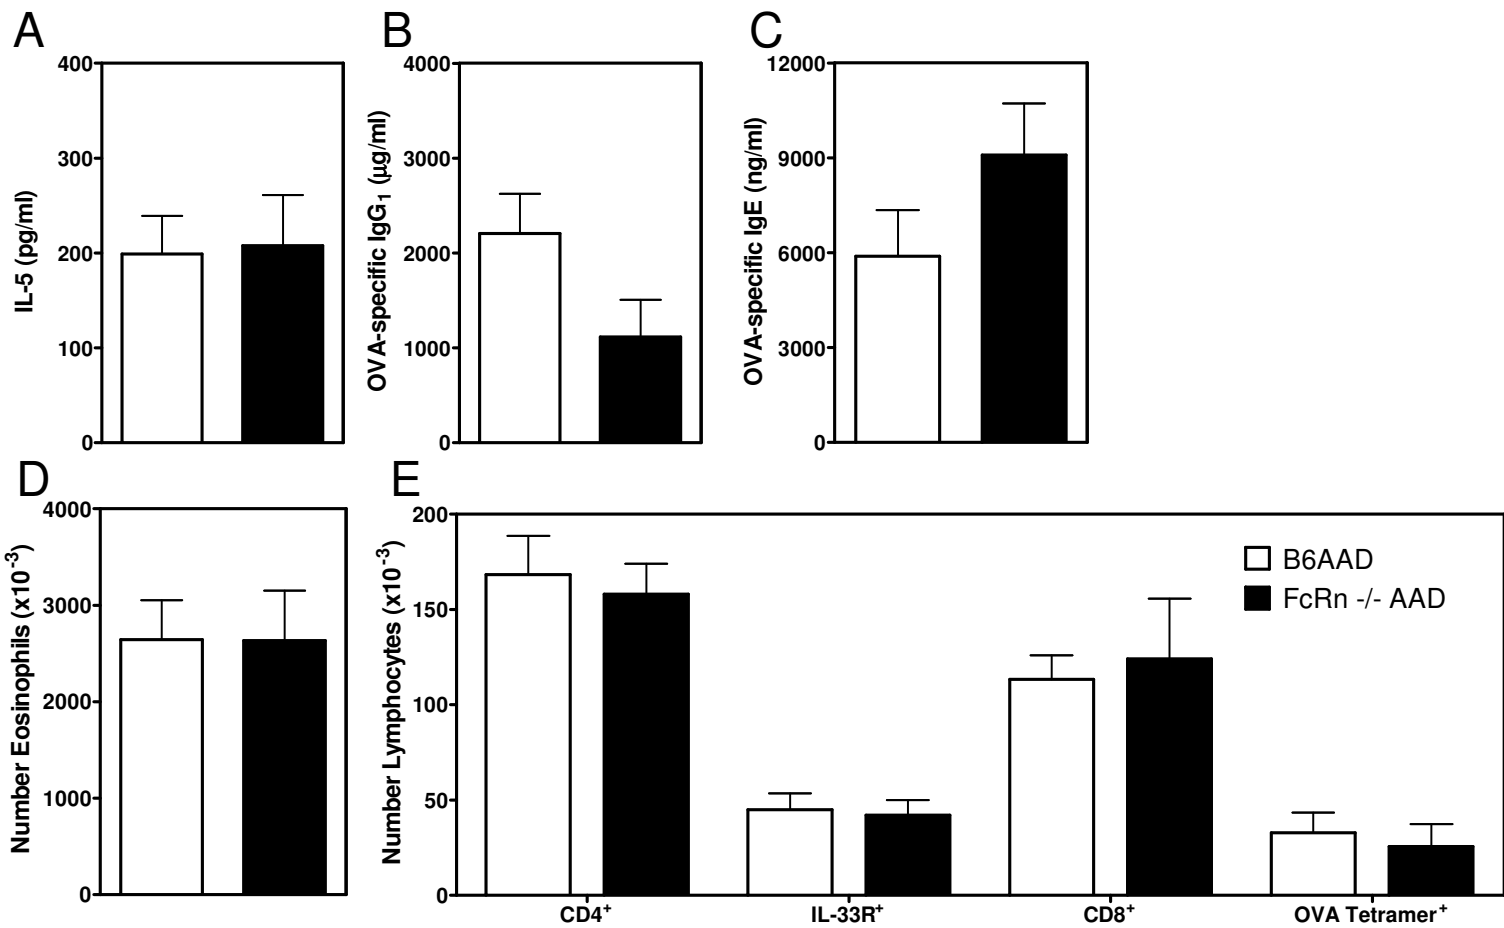

Supplement: MOESM1 [file 9557182]
